# Supplementary material for: Observing the oxidation of platinum
Source: PubMed Central journal article supplement (PMC5585323; doi:10.1038/s41467-017-00643-z), 2017-09-05
Supplement: 41467_2017_643_MOESM2_ESM.pdf [file 41467_2017_643_MOESM2_ESM.pdf]

**Editorial Note:** this manuscript has been previously reviewed at another journal that is not operating a transparent peer review scheme. This document only contains reviewer comments and rebuttal letters for versions considered at Nature Communications.
